# Supplementary material
Source: publisher figshare collection journal article supplement (https://diabetesjournals.figshare.com/ndownloader/files/22613348)
Supplement: Supplementary file 1 [file 22613348]

| **REAGENT or RESOURCE** | **SOURCE** | **IDENTIFIER** |
| --- | --- | --- |
| ***Commercial assays*** |  |  |
| RNeasy Fibrous Tissue Mini kit | Qiagen | Cat# 74704 |
| SuperScript™ III Platunum ™ One-Step qRT-PCR kit | ThermoFisher Scientific | Cat# 11732020 |
| QuantSeq 3’mRNA-Seq Library Prep Kit FWD for Illumina | Lexogen | Cat# 015.96 |
| NE-PER™ Nuclear and Cytoplasmatic Extraction kit | ThermoFisher Scientific | Cat# 78835 |
| Pierce™ BCA Protein Assay | ThermoFisher Scientific | Cat# 23225 |
| ***Antibodies*** |  |  |
| Collagen I | Rockland (1:400) | Cat# 600-401-103-0.1 |
| Collagen III | Rockland (1:400) | Cat# 600-401-105-0.1 |
| Goat anti-rabbit IgG (H+L), Alexa Fluor 488 | ThermoFisher Scientific (1:200) | Cat# A27034 |
| IRS-1 Ser 307 | Millipore (1:750) | Cat# 05-1087 |
| IRS1- Tyr 612 | ThermoFisher Scientific (1:1000) | Cat# 44-816G |
| IRS | Cell Signaling (1:1000) | Cat# 3407 |
| AKT Ser 473 | Cell Signaling (1:1000) | Cat# 9271 |
| AKT | Cell Signaling (1:1000) | Cat# 2967 |
| AMPK Thr 172 | Cell Signaling (1:1000) | Cat# 2531 |
| AMPK | Cell Signaling (1:1000) | Cat# 5831 |
| AS160 Thr 642 | ThermoFisher Scientific (1:1000) | Cat# 44-1071G |
| AS160 | Cell Signaling (1:1000) | Cat# 2447 |
| GLUT4 | Millipore (1:750) | Cat# 07-1404 |
| Glycogen synthase | Cell Signaling (1:1000) | Cat# 3893 |
| JNK Thr 183/Tyr 185 | Cell Signaling (1:1000) | Cat# 9251 |
| JNK | Cell Signaling (1:1000) | Cat# 9252 |
| Vimentin | Cell Signaling (1:1000) | Cat# 5741 |
| MMP-9 | Cell Signaling (1:1000) | Cat# 13667 |
| ILK-1 | Cell Signaling (1:2000) | Cat# 3856 |
| α-Parvin | Cell Signaling (1:1000) | Cat# 8190 |
| Wnt1 | ThermoFisher Scientific (1:1000) | Cat# PA5-34776 |
| Rac1 | Millipore (1:2000) | Cat# 05-389 |
| GSK-3α/β Ser 21/9 | Cell Signaling (1:1000) | Cat# 9331 |
| GSK-3α/β | Cell Signaling (1:1000) | Cat# 5676 |
| β-catenin Ser 33/37 Thr 41 | Cell Signaling (1:1000) | Cat# 9561 |
| β-catenin | Cell Signaling (1:1000) | Cat# 8480 |
| TGF-β1 | Genetex (1:1000) | Cat# GTX130023 |
| Follistatin | Abcam (1:1000) | Cat# ab64490 |
| SMAD 2/3 Ser 465/467 Ser 423/425 | Cell Signaling (1:1000) | Cat# 8828 |
| SMAD 2/3 | Cell Signaling (1:1000) | Cat# 3102 |
| GAPDH | Cell Signaling (1:1000) | Cat# 2118 |
| HSC70 | Santa Cruz Biotechnology (1:1000) | Cat# sc-7298 |
| α-tubulin | Sigma Aldrich (1:2000) | Cat# T9026 |
| Histone H3 | Cell Signaling (1:1000) | Cat# 4499 |
| Goat anti-rabbit Ig Peroxidase Conjugated | Millipore (1:8000) | Cat# AP132P |
| Goat anti-mouse IgG (H+L) HRP  Conjugated | Millipore (1:8000) | Cat# AP308P |
| Veriblot IP detection | Abcam (1:2000) | Cat# ab131366 |
| ***Recombinant protein*** |  |  |
| Transforming Growth Factor–Beta 1 (TGF-β1) | Sigma Aldrich | Cat# T7039 |
| Follistatin | R & D Systems | Cat# 769-FS-025 |
| ***Oligonucleotides*** |  |  |
| Human *FGF1* Forward  (CTGCCTCCAGGGAATTACAA);  Human *FGF1* Reverse  (TATAAAAGCCCGTCGGTGTC) | Invitrogen | N/A |
| Human *FGF2* Forward  (GAGAAGAGCGACCCTCACAT);  Human *FGF2* Reverse  (ACTGCCCAGTTCGTTTCAGT) | Invitrogen | N/A |
| Human *TIMP1* Forward  (AATTCCGACCTCGTCATCAG);  Human *TIMP1* Reverse  (CTGCAGTTTTCCAGCAATGA) | Invitrogen | N/A |
| Human *MSTN* Forward  (GTGGATGGAAAACCCAAATG);  Human *MSTN* Reverse  (GCCTGGGTTCATGTCAAGTT) | Invitrogen | N/A |
| Human *β2M* Forward  (GGTTTACTCACGTCATCCAGC);  Human *β2M* Reverse  (ACACGGCAGGCATACTCAT) | Invitrogen | N/A |
